# Supplementary material
Source: MDPI journal article supplement (https://www.mdpi.com/2071-1050/15/15/12049)
Supplement: s1 [file s1]

1. Jak wyglądał model pracy Twojej firmy przed pandemią COVID-19?

Praca w pełni stacjonarna

Praca hybrydowa z przewagą pracy stacjonarnej

Praca hybrydowa z przewagą pracy zdalnej

Praca w pełni zdalna

Trudno powiedzieć

2. Czy w związku z pandemią COVID-19 dokonano zmiany trybu pracy?

Tak, na pracę w pełni stacjonarna

Tak, na pracę hybrydową z przewagą pracy stacjonarnej

Tak, na pracę hybrydową z przewagą pracy zdalnej

Tak, na pracę w pełni zdalna

Nie, model nie uległ zmianie

Trudno powiedzieć

3. Czy w związku z pandemią COVID-19 dokonano zmiany trybu pracy?

Tak, na pracę w pełni stacjonarna

Tak, na pracę hybrydową z przewagą pracy stacjonarnej

Tak, na pracę hybrydową z przewagą pracy zdalnej

Tak, na pracę w pełni zdalna

Nie, model nie uległ zmianie

Trudno powiedzieć

4.Czy w związku z zakończeniem pandemii COVID-19 dokonano zmiany trybu pracy lub jest planowana taka zmiana?

Tak, na pracę w pełni stacjonarna

Tak, na pracę hybrydową z przewagą pracy stacjonarnej

Tak, na pracę hybrydową z przewagą pracy zdalnej

Tak, na pracę w pełni zdalna

Nie, model nie uległ zmianie

Trudno powiedzieć

5.Jeżeli po zakończonej pandemii jest dokonana bądź planowano długoterminową zmianę na pracę z przewagą pracy stacjonarnej, jakie są powody tej decyzji

Konieczność większej koordynacji i współpracy zespołowej

Trudności w utrzymaniu motywacji pracowników podczas pracy

Potrzeba lepszej kontroli i nadzoru nad pracą pracowników

Trudności w utrzymaniu efektywnej komunikacji wirtualnej

Problemy z łącznością internetową lub technicznymi wymaganiami pracy zdalnej

Brak odpowiedniego wyposażenia lub infrastruktury do pracy zdalnej

Zapotrzebowanie na większą obecność fizyczną w biurze ze względu na specyfikę pracy lub interakcje z klientami

Wpływ na kulturę organizacyjną i atmosferę pracy

Trudności w separacji pracy od życia prywatnego podczas pracy zdalnej

Inne czynniki specyficzne dla danej firmy lub branży

Nie planowano takiej zmiany / nie dotyczy

Inne

6. Jeżeli po zakończonej pandemii jest dokonana bądź planowano długoterminową zmianę na pracę z przewagą pracy zdalnej, jakie są powody tej decyzji

Oszczędności kosztów

Zwiększona produktywność pracowników i efektywniejsze wykorzystanie czasu pracy

Większa elastyczność dla pracowników

Możliwość pozyskania pracowników spoza lokalnego obszaru

Konieczność dostosowania się do rynku pracy w odpowiedzi na wymagania pracowników

Ochrona zdrowia i bezpieczeństwo pracowników

Wpływ na ochronę środowiska i zrównoważony rozwój

Nie planowano takiej zmiany / nie dotyczy

Inne

7. Jakie są Twoje ogólne spostrzeżenia na temat pracy zdalnej, z perspektywy kierownika, w porównaniu do pracy stacjonarnej?

Znacznie lepsze

Nieco lepsze

Bez zmian

Nieco gorsze

Znacznie gorsze

Trudno powiedzieć

8. Jakie korzyści obserwujesz w zakresie kosztów związanych z pracą zdalną w porównaniu do pracy stacjonarnej?

Oszczędności na wynajmie biura

Oszczędności na utrzymaniu stałej infrastruktury biurowej

Oszczędności na materiałach biurowych

Oszczędności na dojazdach i kosztach podróży służbowych

Oszczędności związane z benefitami pracowniczymi, np. posiłki

Nie widzę takich korzyści

Inne

9. Jakie są Twoje obawy dotyczące pracy zdalnej pod względem wydajności i efektywności?

Trudności z nadzorem nad pracą pracowników zdalnych

Ograniczona możliwość monitorowania postępów projektów

Trudności w utrzymaniu efektywnej komunikacji z zespołem

Brak interakcji i brak możliwości nawiązywania relacji międzypracowniczych może wpływać negatywnie na motywację i samopoczucie pracowników

Trudności w skupieniu uwagi ze względu na liczne rozproszenia w środowisku domowym

Awarie techniczne, problemy z siecią lub niewłaściwe działanie sprzętu

Nie mam obaw

Inne

10. Jak oceniasz skuteczność narzędzi i technologii używanych do monitorowania pracy zdalnej pracowników?

Bardzo skuteczne

Raczej skuteczne

Średnio skuteczne

Niezbyt skuteczne

Nie używam/Nie mam doświadczenia z takimi narzędziami

11. Czy Twoja firma dokonała jakichkolwiek inwestycji w narzędzia i infrastrukturę wspierającą pracę zdalną?

Tak

Nie

Trudno powiedzieć

12. Jakie kroki zostały podjęte w firmie, aby zapewnić łączność i komunikację między zespołami pracującymi zdalnie?

Narzędzia do wideokonferencji

Wykorzystanie platform do współpracy online takich jak np. MS Teams, Google Meet, Slack

Komunikacja przez e-mail

Żadnych

Inne

13. Jaki model pracy w Twojej ocenie najlepiej pasuje do Twojego zespołu?

Praca w pełni stacjonarna

Praca hybrydowa z przewagą pracy stacjonarnej

Praca hybrydowa z przewagą pracy zdalnej

Praca w pełni zdalna

Trudno powiedzieć

14. Jak oceniasz produktywność pracowników podczas pracy zdalnej w porównaniu do pracy stacjonarnej?

- Zdecydowanie wyższa podczas pracy zdalnej
- Umiarkowanie wyższa podczas pracy zdalnej
- Zdecydowanie wyższa podczas pracy stacjonarnej
- Umiarkowanie wyższa podczas pracy stacjonarnej
- Trudno powiedzieć/Nie mam porównania

15. Jaki wpływ w Twoim odczuciu ma model pracy zdalnej na współpracę z zatrudnionymi w Twoim zespole?

- Pozytywny
- Negatywny
- Żadnego
- Trudno powiedzieć/Nie mam porównania

16. Jaki wpływ w Twoim odczuciu ma model pracy zdalnej na współpracę z zatrudnionymi w firmie poza Twoim zespołem?

- Pozytywny
- Negatywny
- Trudno powiedzieć/Nie mam porównania
- Żadnego

17.Twoja rola w firmie

Team leader

Kierownik

Dyrektor

Właściciel/Prezes/Członek zarządu

Inne

18.Twój staż pracy w rolach kierowniczych

Do 2 lat

2 do 5 lat

5-10 lat

powyżej 10 lat

19.Wielkość firmy

2 do 9 zatrudnionych

10-50 zatrudnionych

51-250 zatrudnionych

powyżej 250 zatrudnionych

20.Kapitał firmy

Kapitał polski lub przewaga kapitału polskiego

Kapitał zagraniczny lub przewaga kapitału zagranicznego
